# Supplementary material for: Enhancing the stability of organolead halide perovskite films through polymer encapsulation
Source: Royal Society of Chemistry journal article supplement (doi:10.1039/c7ra06002e), 2017-01-01
Supplement: c7ra06002e1.pdf [file c7ra06002e1.pdf]

## Electronic Supporting Information

### Enhancing the Stability of Organolead Halide Perovskite Films Through Polymer Encapsulation

*Barry McKenna<sup>a</sup>, Joel R. Troughton<sup>b</sup>, Trystan M. Watson<sup>b</sup> and Rachel C. Evans<sup>a,c\*</sup>*

<sup>a</sup> School of Chemistry and CRANN, Trinity College, The University of Dublin, Dublin 2, Ireland.

<sup>b</sup> SPECIFIC – College of Engineering, Swansea University, Bay Campus, Swansea, SA1 8EN, U.K.

<sup>c</sup> Department of Materials Science & Metallurgy, University of Cambridge, U.K.

E-mail: [rce26@cam.ac.uk](mailto:rce26@cam.ac.uk)

## Table of Contents

|                                                                                                            |    |
|------------------------------------------------------------------------------------------------------------|----|
| 1. Chemical Structures of the Polymer Encapsulants.....                                                    | S3 |
| 2. Powder X-Ray Diffraction of $\text{CH}_3\text{NH}_3\text{PbI}_{3-x}\text{Cl}_x$ Films.....              | S3 |
| 3. UV/Vis Absorption Studies of Perovskite and Polymer Layers .....                                        | S4 |
| 4. Photographs of Pristine and Degraded $\text{CH}_3\text{NH}_3\text{PbI}_{3-x}\text{Cl}_x$ Film.....      | S6 |
| 5. Fluorescence Microscopy Studies of $\text{CH}_3\text{NH}_3\text{PbI}_{3-x}\text{Cl}_x$ Degradation..... | S6 |

## 1. Chemical Structures of the Polymer Encapsulants

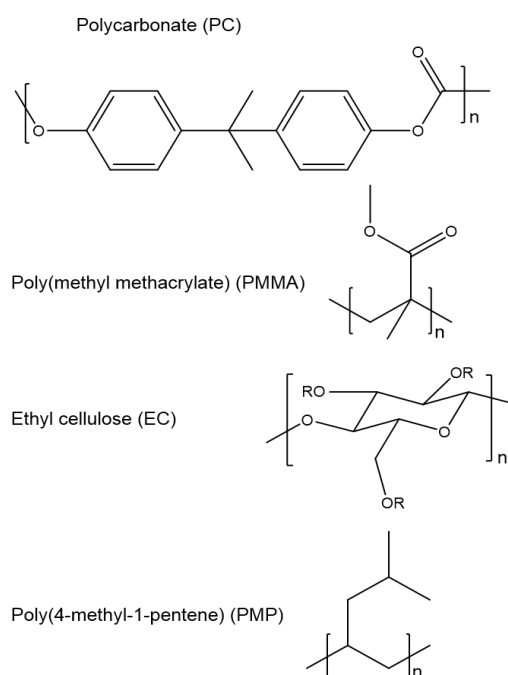

**Figure S1.** Chemical structures of the polymer encapsulants.

## 2. Powder X-Ray Diffraction of $\text{CH}_3\text{NH}_3\text{PbI}_{3-x}\text{Cl}_x$ Films

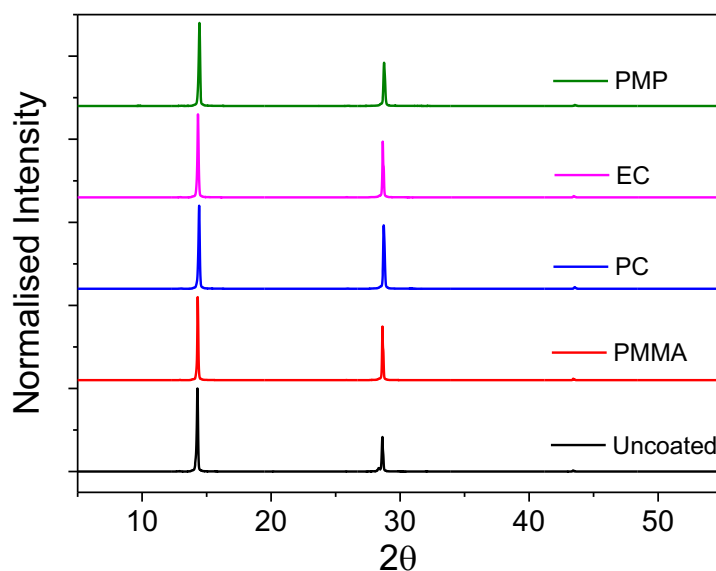

**Figure S2.** Powder X-Ray Diffraction (PXRD) patterns of pristine and polymer encapsulated  $\text{CH}_3\text{NH}_3\text{PbI}_{3-x}\text{Cl}_x$  films before thermal degradation.

### 3. UV/Vis Absorption Studies of Perovskite and Polymer Layers

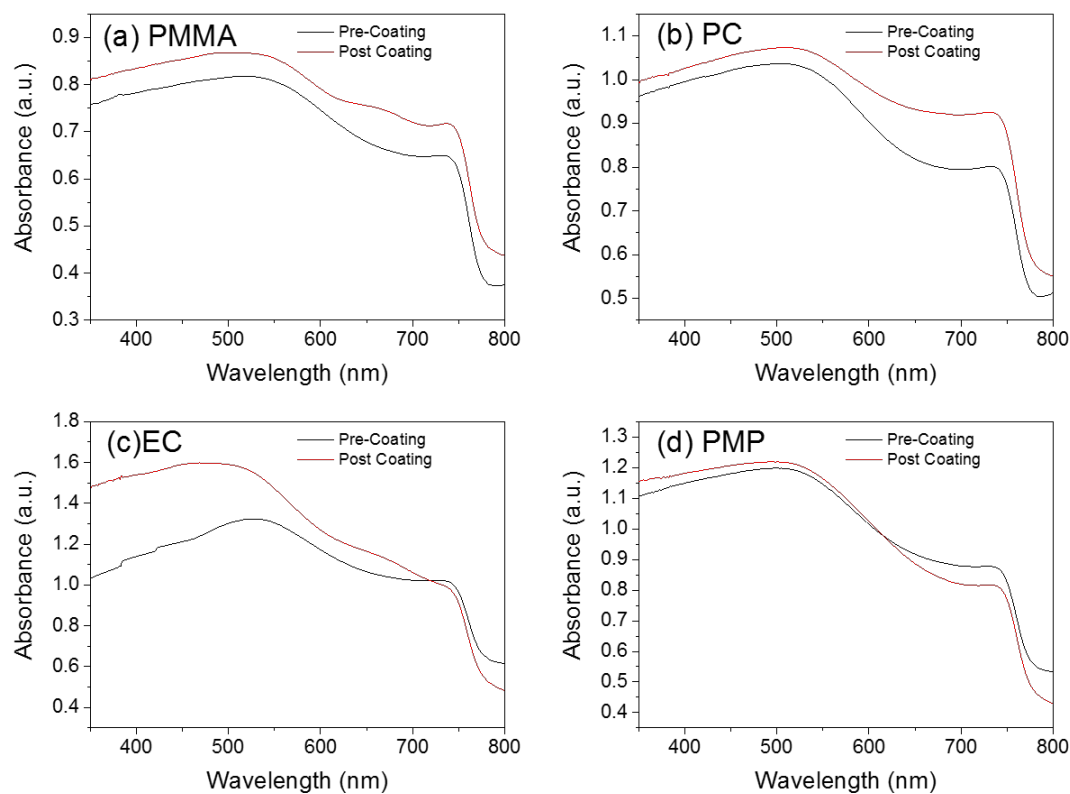

**Figure S3.** UV/Vis absorption spectra of  $\text{CH}_3\text{NH}_3\text{PbI}_{3-x}\text{Cl}_x$  layers before and after coating with (a) PMMA, (b) PC, (c) EC and (d) PMP polymer thin films.

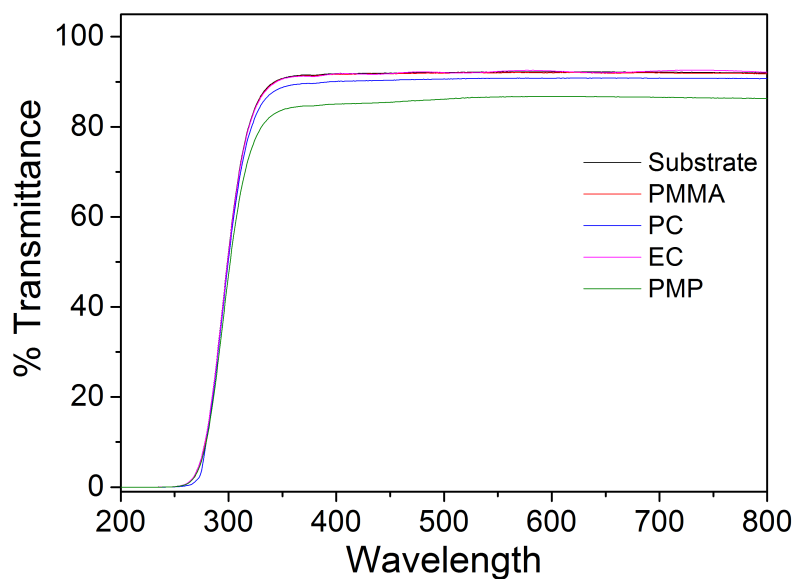

**Figure S4.** Light transmittance of polymer thin films (~800 nm) coated on glass substrates

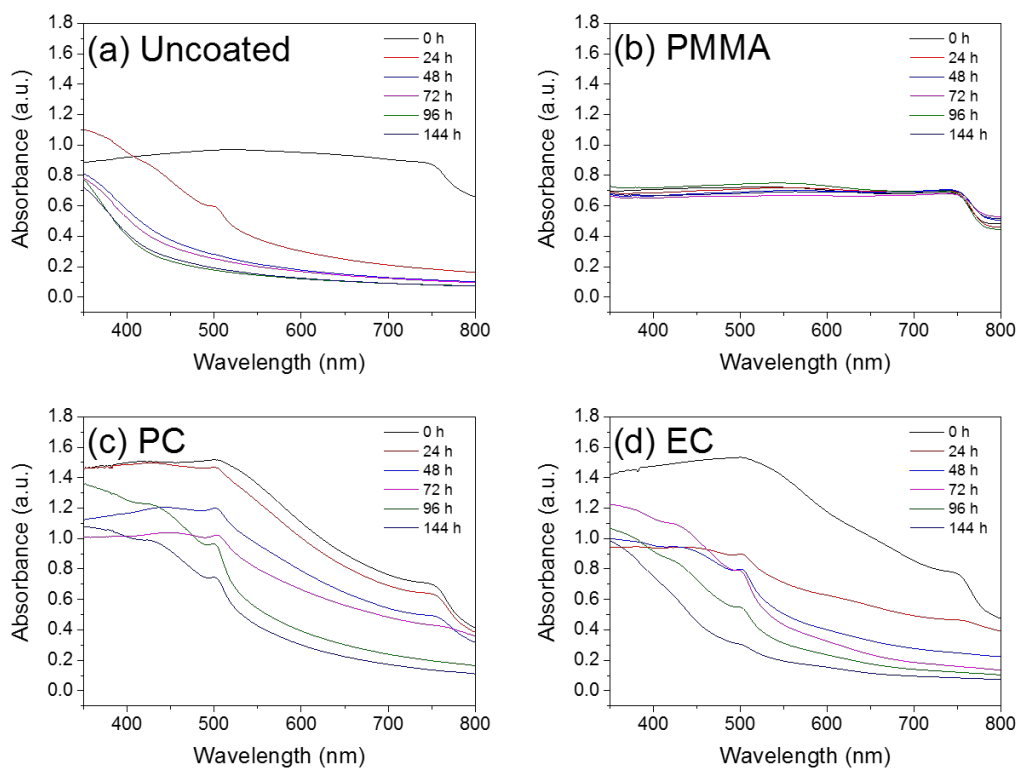

**Figure S5.** UV/Vis absorption spectra of  $\text{CH}_3\text{NH}_3\text{PbI}_{3-x}\text{Cl}_x$  films degraded at  $80^\circ\text{C}$  as a function of time (a) uncoated, (b) PMMA coated, (c) PC coated and (d) EC coated.

#### 4. Photographs of Pristine and Degraded $\text{CH}_3\text{NH}_3\text{PbI}_{3-x}\text{Cl}_x$ film

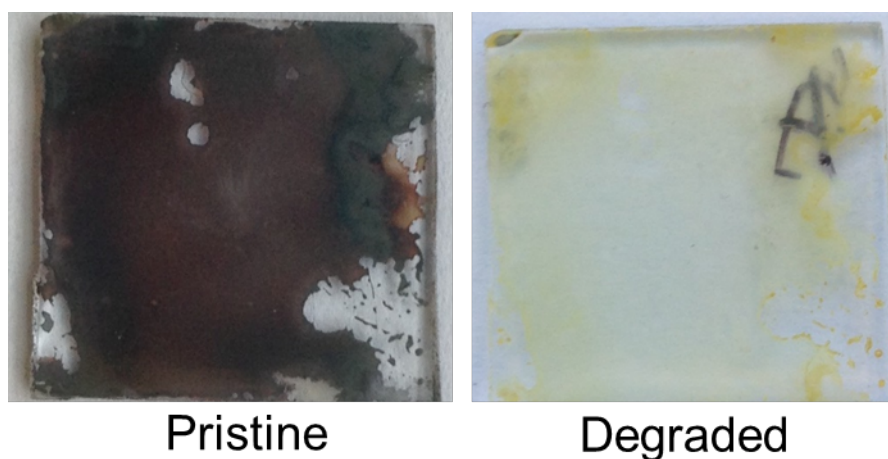

**Figure S6.** Photograph of uncoated  $\text{CH}_3\text{NH}_3\text{PbI}_{3-x}\text{Cl}_x$  film before and after 432 h degradation at 60 °C in air.

#### 5. Fluorescence Microscopy Studies of $\text{CH}_3\text{NH}_3\text{PbI}_{3-x}\text{Cl}_x$ Degradation

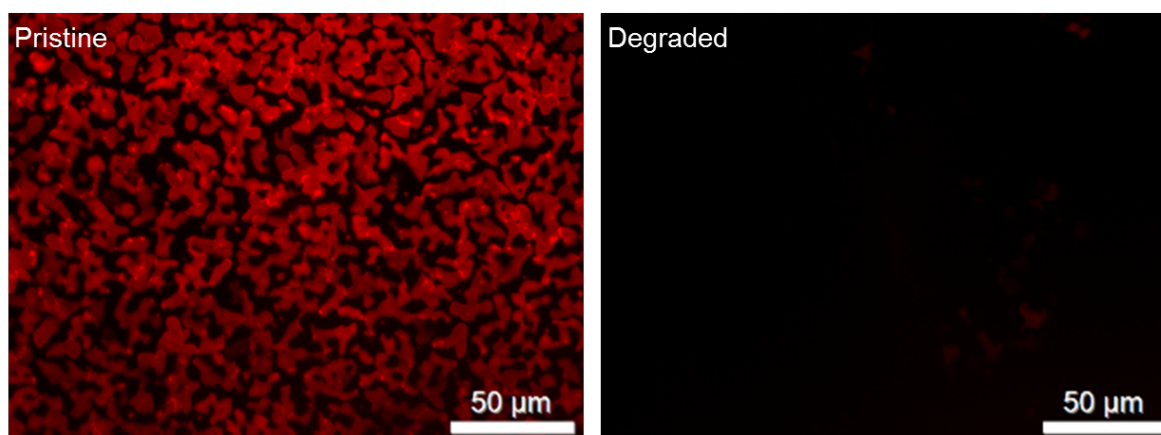

**Figure S7.** Fluorescence microscopy images of uncoated perovskite before and after thermal degradation at 60 °C for 48 h.

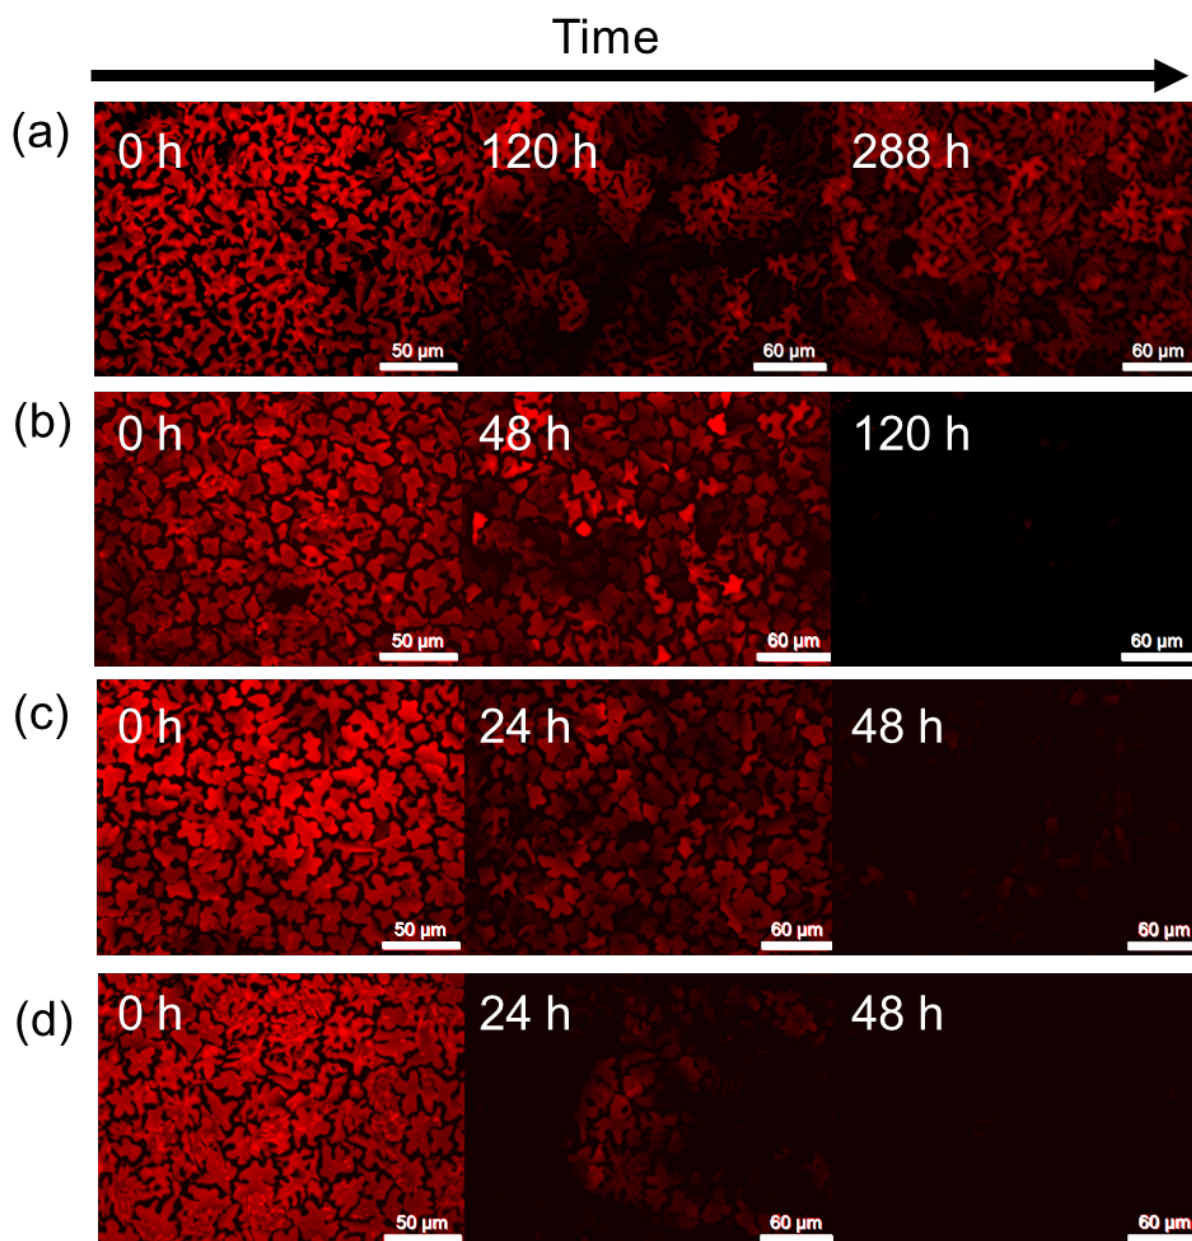

**Figure S8.** Thermal degradation of polymer encapsulated  $\text{CH}_3\text{NH}_3\text{PbI}_{3-x}\text{Cl}_x$  films at  $80\text{ }^\circ\text{C}$  as a function of time monitored by fluorescence microscopy.  $\text{CH}_3\text{NH}_3\text{PbI}_{3-x}\text{Cl}_x$  degradation is accompanied by a decrease in emission intensity and hence darkening of the image. (a) PMMA showing degradation onset after 120 h, (b) PC after 48 h, (c) EC after 24 h and (d) PMP after 24 h.

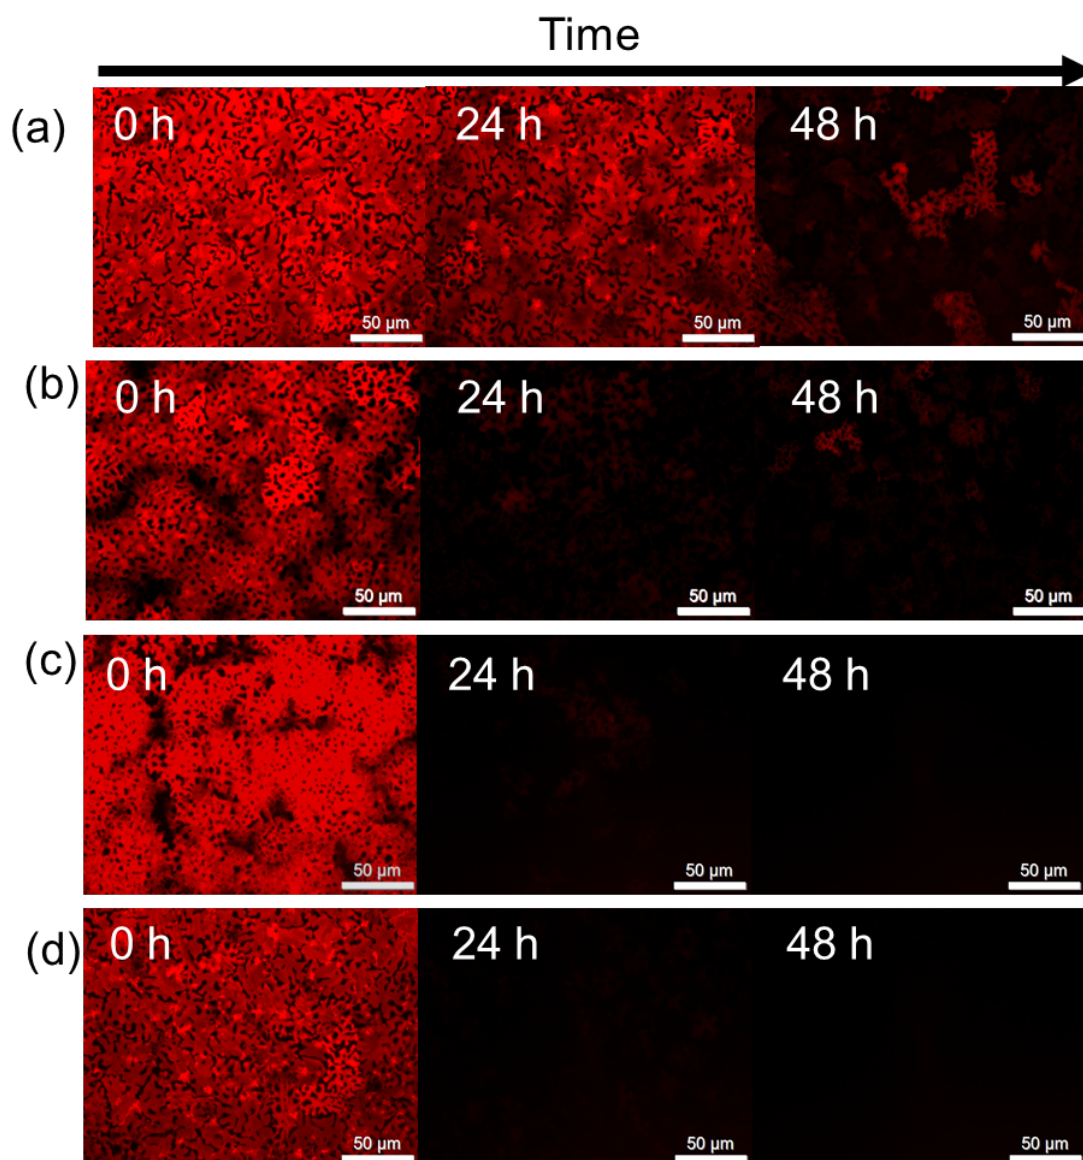

**Figure S9.** Thermal degradation of polymer encapsulated  $\text{CH}_3\text{NH}_3\text{PbI}_{3-x}\text{Cl}_x$  films at  $100\text{ }^\circ\text{C}$  as a function of time monitored by fluorescence microscopy.  $\text{CH}_3\text{NH}_3\text{PbI}_{3-x}\text{Cl}_x$  degradation is accompanied by a decrease in emission intensity and hence darkening of the image. (a) PMMA showing degradation onset after 24 h, (b) PC showing complete degradation after 24 h, (c) EC showing complete degradation after 24 h and (d) PMP showing complete degradation after 24 h.
